# Supplementary material for: Effect of Combined Immune Checkpoint Inhibition vs Best Supportive Care Alone in Patients With Advanced Colorectal Cancer: The Canadian Cancer Trials Group CO.26 Study
Source: PubMed Central journal article supplement (PMC7206536; doi:10.1001/jamaoncol.2020.0910), 2020-05-07

## Supplementary Online Content

Chen EX, Jonker DJ, Loree JM, et al. Effect of combined immune checkpoint inhibition vs best supportive care alone in patients with advanced colorectal cancer: The Canadian Cancer Trials Group CO.26 Study. *JAMA Oncol*. Published online May 7, 2020.  
10.1001/jamaoncol.2020.0910

**eTable 1.** Molecular characteristics from baseline cfDNA analysis

**eFigure 1.** Hazard ratios for overall survivals (A) and the corresponding p-value (B) with different TMB cut-points

**eFigure 2.** Overall Survival in patients with baseline TMB < 28 (A) and TMB ≥ 28 (B)

**eFigure 3.** Progression-free survival

This supplementary material has been provided by the authors to give readers additional information about their work.

Table 1S. Molecular characteristics from baseline cfDNA analysis

| <b>Molecular Marker</b>                | <b>Durvalumab + Tremelimumab<br/>(n = 119)</b> | <b>Best Supportive Care<br/>(n = 61)</b> |
|----------------------------------------|------------------------------------------------|------------------------------------------|
| <b>Primary site of disease – N (%)</b> |                                                |                                          |
| Right + transverse colon               | 31 (26)                                        | 19 (31)                                  |
| Left colon + rectum                    | 87 (73)                                        | 41 (67)                                  |
| Unknown                                | 1 (1)                                          | 1 (2)                                    |
| <b>KRAS mutation – N (%)</b>           |                                                |                                          |
| Yes                                    | 93 (78)                                        | 30 (49)                                  |
| No                                     | 25 (21)                                        | 20 (33)                                  |
| Unknown                                | 1 (1)                                          | 11 (18)                                  |
| <b>NRAS mutation – N (%)</b>           |                                                |                                          |
| Yes                                    | 11 (10)                                        | 10 (16)                                  |
| No                                     | 107 (89)                                       | 40 (66)                                  |
| <b>BRAF V600E mutation – N (%)</b>     |                                                |                                          |
| Yes                                    | 8 (7)                                          | 7 (12)                                   |
| No                                     | 110 (92)                                       | 43 (70)                                  |
| Unknown                                | 1 (1)                                          | 11 (18)                                  |
| <b>Microsatellite status – N (%)</b>   |                                                |                                          |
| MSI-H/dMMR                             | 1 (1)                                          | 1 (2)                                    |
| MSS/pMMR                               | 117 (98)                                       | 49 (80)                                  |
| Unknown                                | 1 (1)                                          | 11 (18)                                  |

Abbreviations: cfDNA – cell free DNA; dMMR – deficient mismatch repair; MSI-H: microsatellite-instability high; MSS- microsatellite stable; pMMR – proficient mismatch repair

Figure 1S: Hazard ratios for overall survivals (A) and the corresponding p-value (B) with different TMB cut-points

A:

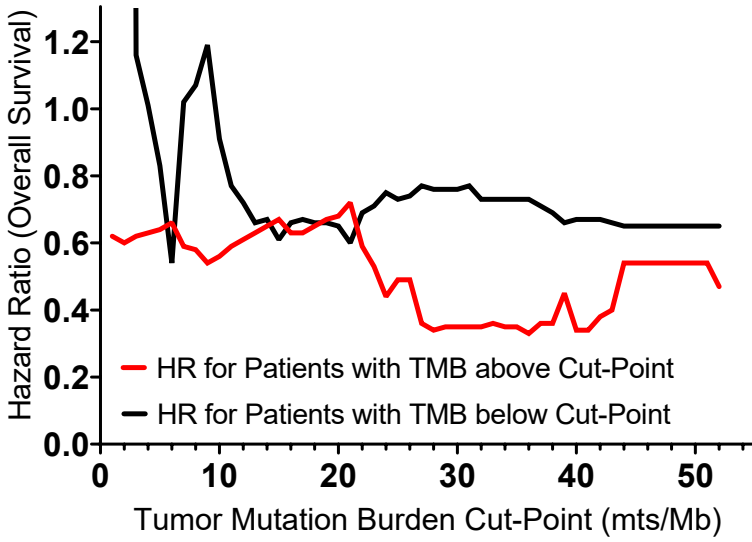

B:

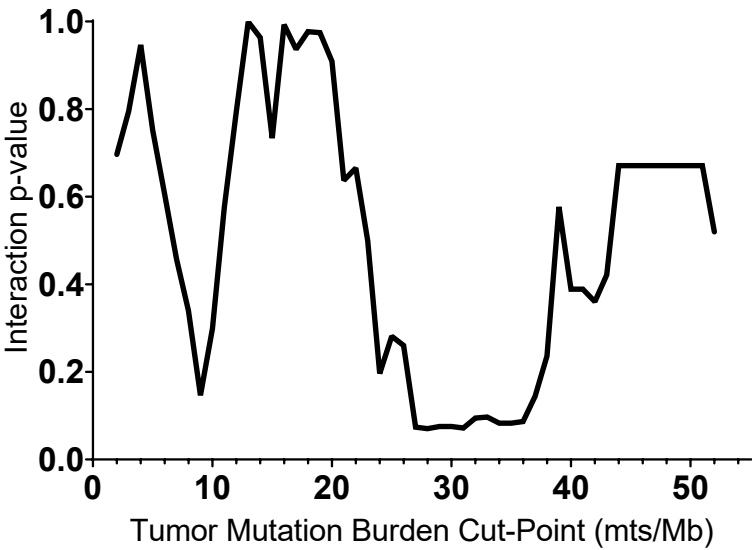

Figure 2S: Overall Survival in patients with baseline TMB < 28 (A) and TMB ≥ 28 (B)

A:

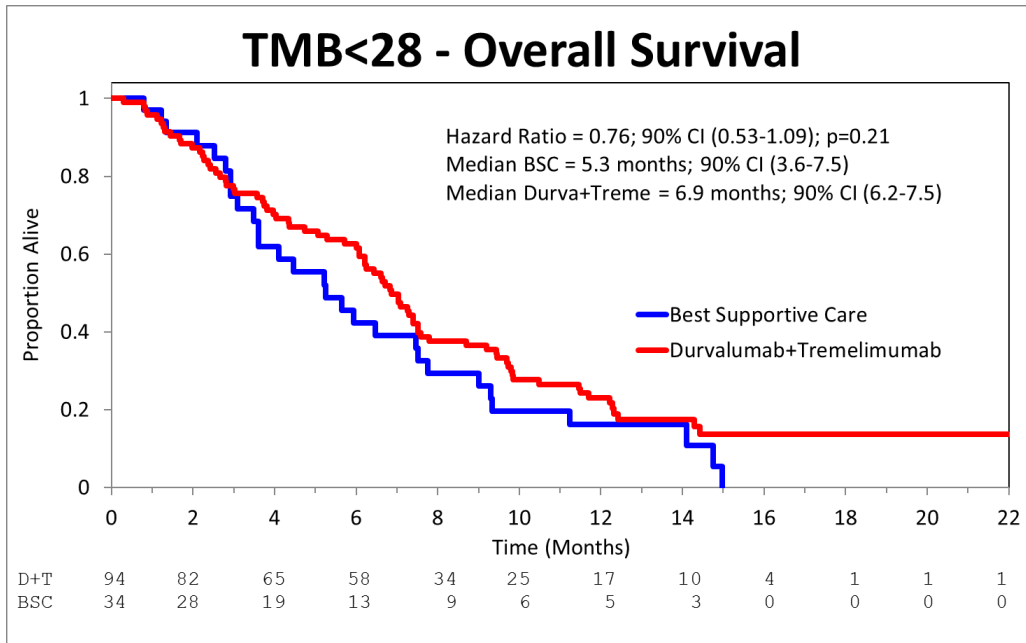

B:

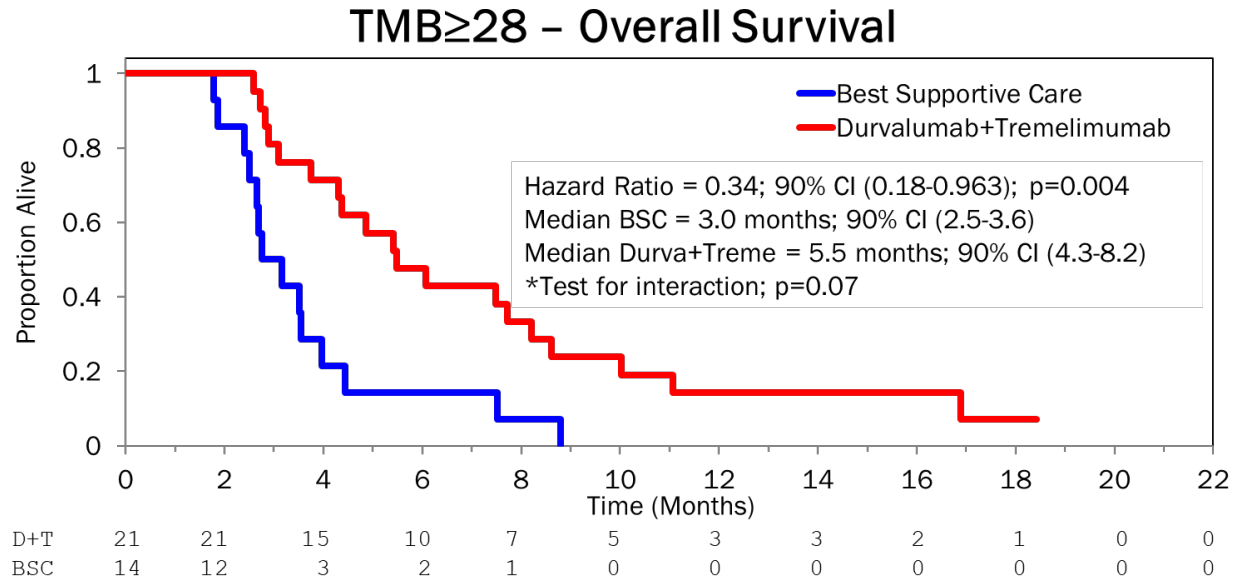

Figure 3S. Progression-free survival

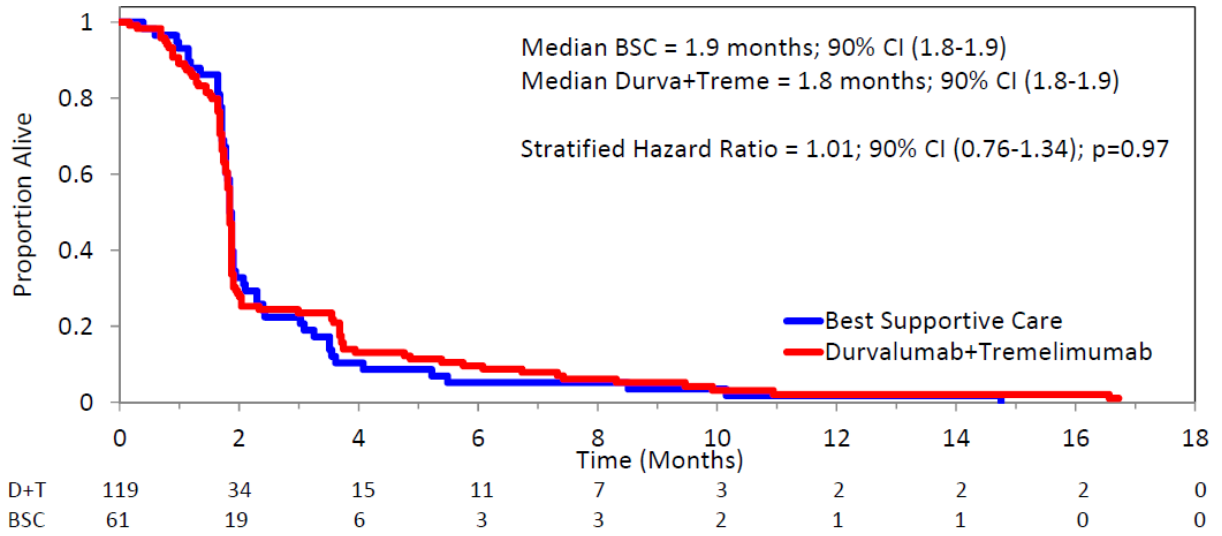

Supplement: jamaoncol-6-831-s002.pdf [file jamaoncol-6-831-s002.pdf]
