# Supplementary material for: Effect of Combined Immune Checkpoint Inhibition vs Best Supportive Care Alone in Patients With Advanced Colorectal Cancer: The Canadian Cancer Trials Group CO.26 Study
Source: PubMed Central journal article supplement (PMC7206536; doi:10.1001/jamaoncol.2020.0910), 2020-05-07
Supplement: jamaoncol-6-831-s003.pdf [file jamaoncol-6-831-s003.pdf]

# Data Sharing Statement

Chen. Effect of Combined Immune Checkpoint Inhibition vs Best Supportive Care Alone in Patients With Advanced Colorectal Cancer. *JAMA Oncol*. Published May 07, 2020. 10.1001/jamaoncol.2020.0910

## Data

**Data available:** Yes

**Data types:** Deidentified participant data

**How to access data:** Data collected from this study, including individual participant data and a data dictionary defining each field, will be made available to interested researchers. The Canadian Cancer Trials Group (CCTG) has an established request procedure and interested investigators should submit a brief proposal using the Request for Data Proposal Form available at <http://www.ctg.queensu.ca/>. Upon approval, de-identified individual participant data, and relevant study documents (protocol and statistical analysis plan) will be made available.

**When available:** With publication

## Supporting Documents

**Document types:** None

## Additional Information

**Who can access the data:** Data collected from this study, including individual participant data and a data dictionary defining each field, will be made available to interested researchers. The Canadian Cancer Trials Group (CCTG) has an established request procedure and interested investigators should submit a brief proposal using the Request for Data Proposal Form available at <http://www.ctg.queensu.ca/>. Upon approval, de-identified individual participant data, and relevant study documents (protocol and statistical analysis plan) will be made available.

**Types of analyses:** Data collected from this study, including individual participant data and a data dictionary defining each field, will be made available to interested researchers. The Canadian Cancer Trials Group (CCTG) has an established request procedure and interested investigators should submit a brief proposal using the Request for Data Proposal Form available at <http://www.ctg.queensu.ca/>. Upon approval, de-identified individual participant data, and relevant study documents (protocol and statistical analysis plan) will be made available.

**Mechanisms of data availability:** Data collected from this study,

including individual participant data and a data dictionary defining each field, will be made available to interested researchers. The Canadian Cancer Trials Group (CCTG) has an established request procedure and interested investigators should submit a brief proposal using the Request for Data Proposal Form available at <http://www.ctg.queensu.ca/>. Upon approval, de-identified individual participant data, and relevant study documents (protocol and statistical analysis plan) will be made available.
